# Supplementary material for: Large-scale synthesis of PEGylated lutetium hydroxycarbonates as nanoparticulate contrast agents for X-ray CT imaging
Source: Royal Society of Chemistry journal article supplement (doi:10.1039/c4nj01524j), 2014-10-13
Supplement: c4nj01524j1.pdf [file c4nj01524j1.pdf]

## Supporting Information for

### Large-Scale Synthesis of PEGylated Lutetium Hydroxycarbonates as Nanoparticulate Contrast Agent for X-ray CT Imaging

*Zhaogui Ba<sup>a,b</sup>, Yumin Zhang<sup>b</sup>, Junpei Wei<sup>c</sup>, Jiwu Han<sup>b</sup>, Zhenqiang Wang<sup>b</sup>, Guangrui  
Shao<sup>a,\*</sup>*

<sup>a</sup> Department of Radiology, The Second Hospital of Shandong University, Shandong University,  
Shandong 250033 (P. R. China)

E-mail: shaoguangrui@yeah.net

<sup>b</sup> Department of Radiology, Laigang Hospital Affiliated to Taishan Medical University, Laiwu  
271126 (P. R. China)

<sup>c</sup> Department of Radiology, People's Hospital of Xintai City, Xintai, 271200 (P. R. China)

Z. G. Ba and Y. M. Zhang should be regarded as Joint First Authors.

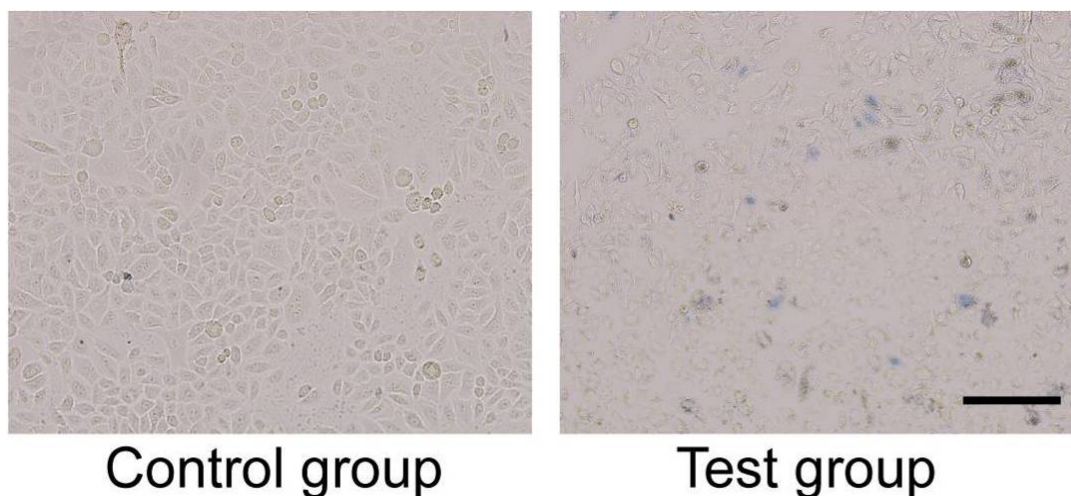

**Figure S1.** Microscopic images of HeLa cells incubated without and with PEG-LuNPs.

**Table S1.** Exact value of hemolysis percentage upon PEG-LuNPs with different concentrations.

| Concentrations ( mg PEG-LuNPs mL <sup>-1</sup> ) | Value of hemolysis |
|--------------------------------------------------|--------------------|
| PBS                                              | 0                  |
| water                                            | 100                |
| 0.625                                            | 0.0035             |
| 0.125                                            | -0.0041            |
| 0.25                                             | 0.0057             |
| 0.50                                             | 0.0029             |
| 1.00                                             | 0.0077             |

**Table S2.** CT values of the heart, liver, spleen, and kidneys of a rat before and after intravenous administration of PEG-LuNPs at different timed intervals.

| Time          | Heart | Liver | Spleen | Kidneys   |
|---------------|-------|-------|--------|-----------|
| Pre-injection | 52.4  | 57.3  | 56.9   | 47.6/47.9 |
| 20 min        | 53.7  | 96.5  | 74.3   | 46.3/47.5 |
| 40 min        | 55.4  | 120.1 | 104.2  | 49.1/48.2 |
| 60 min        | 54.1  | 145.3 | 137.1  | 48.3/47.3 |
